# Supplementary material for: Clec11a/osteolectin is an osteogenic growth factor that promotes the maintenance of the adult skeleton
Source: eLife. 2016 Dec 13;5:e18782. doi: 10.7554/eLife.18782 (PMC5158134; doi:10.7554/eLife.18782)
Supplement: Figure 1—source data 1. — DOI: http://dx.doi.org/10.7554/eLife.18782.003 [file elife-18782-fig1-data1.xlsx]

## Sheet: Figure 1
Figure 1A
	Whole bone marrow cells	Endothelial cells	Bone marrow stromal cells	Osteoblasts
Clec11aSignal intensity:	94.2391	68.3913	600.23	1741.89
	92.3219	79.7418	557.066	1104.19
	75.2141	88.9513	925.521	358.312
Figure 1B
	Whole bone marrow cells	Endothelial cells	Bone marrow stromal cells
Clec11a FPKM:	593.08	629.15	18802.1
	659.22	0	209752
Figure 1C
	WBM	Endothelial	LepR+ MSC	Osteoblast	CMP	GMP	MEP	CLP	CD3+ T cells	Erythroid	Myeloid	LSK	MPP	HSC	B220+ B cells	Pro-B	Pre-B	Pre-Pro-B	Spleen B220+	Spleen CD4+	Spleen CD8+
Relative fold change:	1.59724	2.65804	8148.5	18310.2	0.000585647	9.01494	0.359065	0.421124	0.00365879	0.171417	0.0070195	0.000351438	0.0459292	0.101923	0.385702	15.1953	0.000312373	0.000353882	4.318	11.8792	44.0284
	0.0218774	0.000274742	9791.53	25894.6	1.35879	0.415327	4.84776	0.0855148	0.00101492	1.55357	2.09302	0.000323389	2.29033	0.844142	0.000341828	0.419155	0.617948	3.00124	1.20611	9.00274	7.21182
	1.38088	1.25171	10714.8	15397	1.70801	4.57039	0.168675	0.0296118	0.709849	0.385709	0.419163	0.815387	0.0531258	0.2804	1.08339	1.72376	28.3555	4.97797	1.39509	14.8292	13.0897
Figure 1L
	Control		Clec11a KO
	2 m	10 m	2 m	10 m
Body mass (g):	19	38.8	18.4	28.08
	23.29	43.8	23.32	34.6
	18.311	35.1	18.836	33.2
	27.2	38.3	25.1	46.2
	21.8	38.9	18.4	45.3
	24.5	48.5	20.4
	18.7		19.8
	21.2		22.9
Figure 1M
	Bone marrow:					Spleen:
	Control		Clec11a KO			Control		Clec11a KO
	2 m	10 m	2 m	10 m		2 m	10 m	2 m	10 m
Cellularity (X10^6):	80.5243	189.51	79.8288	196.47		118.129	157.621	128.312	90.6083
	89.7638	124.19	79.5307	164.43		134.621	98.6061	139.589	126.573
	81.816	178.09	99.8484	178.09		112.416	145.45	107.896	160.85
	94.2598	152.7	94.6944	145.25		150.418	133.68	128.511	185.84
	93.6637	137.3	90.087	174.46
	118.725	176.35	110.081	172.87
	122.004		119.52
	112.963		87.1312
Figure 1N
	Bone marrow:					Spleen:
	Control		Clec11a KO			Control		Clec11a KO
	2 m	10 m	2 m	10 m		2 m	10 m	2 m	10 m
Mac1+Gr1+ cell (%):	46.03	45.74	39.66	66.1		3.88	10.29	4.54	4.49
	50.8424	18.9	54.58	44.73		4.84	3.97	3.93	4.55
	38.58	72.96	40.72	50.99		2.46	2.66	3.04	8.19
	69.783	65.61	50.25	52.43		7.68	3.11036	3.65	5.76
	32.4068	54.11	27.38	53.07
	48.0327	46.39	45.0106	68.89
	58.1145		60.1652
	68.8091		60.4246
Figure 1O
	Bone marrow:					Spleen:
	Control		Clec11a KO			Control		Clec11a KO
	2 m	10 m	2 m	10 m		2 m	10 m	2 m	10 m
Ter119+CD71+ cell (%):	20.63	21.48	19.48	11.81		2.5	9.16	1.65	2.47
	16.8777	32.77	15.58	21.56		3.72	3.48	6.09	2.74
	10.6	9.26	7.39	22.55		2.35	15.27	4.54	15.79
	10.009	9.95	15.74	18.61		7.47	8.03509	2.26	14.61
	28.2572	14.85	29.19	15.61
	19.9657	22.08	19.5531	9.82
	13.613		19.4137
	11.2452		18.9777
Figure 1P
	Bone marrow:					Spleen:
	Control		Clec11a KO			Control		Clec11a KO
	2 m	10 m	2 m	10 m		2 m	10 m	2 m	10 m
CD3+ cell (%):	2.98	1.85	2.09	1.96		36.41	15.96	33.34	24.6
	1.7546	2.51	1.08	2.04		33.5	23.18	31.09	22.45
	5.9	1.3	7.49	1.88		41.7	18.51	49.77	15
	1.0999	0.77	1.68	1.09		21.73	29.8076	33.52	24.48
	3.1197	1.54	3.27	1.26
	1.1501	1.12	2.113	0.9
	2.1934		1.3701
	0.8248		0.7949
Figure 1Q
	Bone marrow:					Spleen:
	Control		Clec11a KO			Control		Clec11a KO
	2 m	10 m	2 m	10 m		2 m	10 m	2 m	10 m
B220+ cell (%):	19.66	17.04	27.93	6.68		45.53	41.01	48.17	53.02
	18.6621	24.43	18.14	19.18		43.1	49.51	42.02	49.9
	31.08	6.51	30.08	13.25		41.62	42.86	33.03	38.12
	10.7089	3.82	21.11	8.52		50.75	37.6333	48.3	39.82
	23.6076	9.17	27.5	12.98
	21.5698	12.58	21.929	6.11
	17.215		9.7723
	11.0139		10.163
Figure 1R
	Bone marrow:					Spleen:
	Control		Clec11a KO			Control		Clec11a KO
	2 m	10 m	2 m	10 m		2 m	10 m	2 m	10 m
HSCs (%):	0.007	0.0151	0.0059	0.0198		0.0011	0.0235751	0.0003	0.00593569
	0.0073	0.0279	0.01	0.0131		0.0004	0.00641096	0.0034	0.0103207
	0.0092	0.0164	0.0064	0.0114		0.0008	0.0345435	0.0003	0.0122377
	0.0092	0.0576212	0.0046	0.0403111		0.0008		0.0003
	0.0069	0.0412925	0.0052	0.035102
	0.009	0.0547814	0.0084	0.0363203
	0.0062		0.0096
	0.0094		0.0164
Figure 1S
	Bone marrow:					Spleen:
	Control		Clec11a KO			Control		Clec11a KO
	2 m	10 m	2 m	10 m		2 m	10 m	2 m	10 m
MPPs (%):	0.0058	0.0139	0.0081	0.0176		0.001	0.0030846	0.0004	0.000989281
	0.0098	0.0209	0.0093	0.0129		0.0008	0.0016621	0.0025	0.000897455
	0.01	0.0181	0.0084	0.024		0.001	0.00792079	0.0006	0.00920633
	0.009	0.0348642	0.006	0.0362347		0.0005	0.00564904	0.001	0.00946481
	0.0166	0.0445822	0.0068	0.0383928
	0.0134	0.0392368	0.017	0.0430544
	0.013		0.0206
	0.0202		0.025
Figure 1T
	Bone marrow:
	GMP					MEP					CMP					CLP
	Control		Clec11a KO			Control		Clec11a KO			Control		Clec11a KO			Control		Clec11a KO
	2 m	10 m	2 m	10 m		2 m	10 m	2 m	10 m		2 m	10 m	2 m	10 m		2 m	10 m	2 m	10 m
Progenitor cells (%):	0.2288	0.82015	0.2415	0.810411		0.1979	0.342701	0.2473	0.398695		0.1581	0.307052	0.1804	0.292142		0.0455	0.0114346	0.0527	0.0178909
	0.1491	0.831181	0.1718	0.699626		0.3018	0.438108	0.3403	0.338734		0.3417	0.347356	0.2673	0.26118		0.035	0.0173564	0.0371	0.0242423
	0.1144	0.678067	0.0824	0.639414		0.3134	0.350022	0.2598	0.181712		0.3872	0.301994	0.3766	0.338033		0.025	0.0140438	0.0306	0.0126955

## Sheet: Figure 1-figure supplement 1
Figure 1-figure supplement 1H
	Contorl	Clec11a KO
Relative mRNA level:	1	0.00272411
	1	0.000787736
	1	0.00128858
	1	0.00179724
	1	0.0227183
Figure 1-figure supplement 1J
	Clec11a+/+	Clec11a+/-	Clec11a-/-
Plasma Clec11a (ng/ml):	3.35722	1.99975	-0.0753418
	0.688662	1.15778	-0.023741
	1.40999	0.995471	-0.176862
			-0.154027
			0.0790803
			-0.0701782
Figure 1-figure supplement 1L
	Control				Clec11a KO
	2 m	10 m	16 m		2 m	10 m	16 m
RBC (X10^6/ul)	8.83	9.11	8.85		8.92	9.66	9.9
	10.29	9.59	9.72		9.51	9.46	8.08
	9.54	9.19	9.64		8.66	8.27	9.03
	7.77	9.01	9.09		9.29	9.54	9.1
	8.8	8.99			8.73	10.3
	8.38	9.06			9.14
Figure 1-figure supplement 1M
	Control				Clec11a KO
	2 m	10 m	16 m		2 m	10 m	16 m
WBC (X10^6/ul)	3.62	6.26	4.32		2.72	12.3	5.26
	7.76	4.52	4.42		4.74	4.3	2.64
	1.8	4.62	2.96		1.98	3.26	4.3
	4.6	3.8	4.54		5.78	5.82	4.25
	3.58	3.12			4.6	1.82
	4.94	2.2			5.72
Figure 1-figure supplement 1N
	Control				Clec11a KO
	2 m	10 m	16 m		2 m	10 m	16 m
PLT (X10^6/ul)	857	1378	1849		927	2015	1400
	882	2325	1441		953	1744	1867
	1020	1448	1711		948	1590	1632
	1058	1078	1238		1066	1104	1538
	978	1185			1014	1296
	889	1012			1030
Figure 1-figure supplement 1O
	Overall reconstitution:
	Control				Clec11a KO
	4 w	8 w	12 w	16 w	4 w	8 w	12 w	16 w
% Donor Derived:	82.0849	83.6612	80.0327	94.2418	67.2369	81.979	92.0319	97.5
	66.2001	57.9046	85.8635	95.4047	57.5974	58.4032	67.6117	87.3
	50.6892	85.6291	71.6762	71.7648	54.5763	73.1219	85.1589	78.9
	48.0573	79.8876	84.8832	84.1661	71.5797	69.2255	59.2864	60.5
	47.2143	74.2981	87.1881	87.5387	65.0786	76.6676	90.7444	96.1571
	61.1	64.7	56.2	52.3	39.4	53.6	61.1	61.3
	29.4	13.4	7.3	5.4	35	49.8	52.2	52.8
	32.9	38.9	45.7	52.2	46.5	66.3	75.6	81.3
	61	70.1	61.6	53.2	33.5	53.2	72.8	82.5
	47.2	64.4	78.8	84.5	29.9	10.9	6.2	4.4
Figure 1-figure supplement 1P
	T cell reconstitution:
	Control				Clec11a KO
	4 w	8 w	12 w	16 w	4 w	8 w	12 w	16 w
% Donor Derived:	97.5309	77.5602	82.549	85.056	96.2617	81.0149	91.1914	96.2
	92.5	60.8128	66.7692	91.0771	88.7218	60.9637	73.5338	91.6
	11.6129	82.5672	60.7124	82.4086	91.4692	55.7701	88.7743	84.2
	70.7379	79.8607	78.5622	75.036	86.2745	41.0616	59.1563	63.3
	69.4444	81.1332	78.8757	85.1064	69.4444	52.7027	93.5995	96.9805
	4.9	31.3	42.6	35.6	5.2	26.4	31.1	29.6
	4	6.2	3.3	3.4	17.9	24.1	40.2	34.5
	3.7	15.3	26.3	28.8	14.7	33.3	50.4	63
	3.8	50.4	52.7	37.1	6	20.7	46.8	62.8
	8.4	24.4	53.6	64.1	8.7	12.7	7.9	4.4
Figure 1-figure supplement 1Q
	B cell reconstitution:
	Control				Clec11a KO
	4 w	8 w	12 w	16 w	4 w	8 w	12 w	16 w
% Donor Derived:	91.2268	83.6963	85.5292	95.5885	90.658	84.2879	95.1628	98.5
	85.8772	60.6136	90.1344	95.2573	82.6087	68.7325	62.5311	96.1
	71.0087	89.8656	76.8012	80.8091	85.4519	78.8405	94.393	73.9
	74.1981	91.9382	84.7364	86.0258	91.5732	73.8687	67.69	60.1
	74.1986	81.5568	88.2825	89.4586	78.1838	59.5625	93.1868	96.9785
	77.6	80.2	76.9	73.6	52.2	70.3	75.7	78.1
	54	18.9	13	10.4	38.8	66.3	66.9	69
	45.9	51	51.5	55.2	62.9	78.9	84	87.5
	76.5	88.8	79.5	70.8	49.2	67.4	79.2	87
	66.2	77.7	83.6	89.1	39.7	14.2	7.5	5.9
Figure 1-figure supplement 1R
	T cell reconstitution:
	Control				Clec11a KO
	4 w	8 w	12 w	16 w	4 w	8 w	12 w	16 w
% Donor Derived:	57.9663	89.3094	50.7163	98.3257	39.5809	80.5874	84.7341	95.2
	46.4272	40.6346	91.2415	99.7234	28.3293	42.2784	70.5111	54.4
	28.6619	72.1095	66.7283	38.7755	15.132	80.2867	48.1718	87.8
	23.4915	65.3645	88.8542	93.8895	44.7623	83.4869	35.0785	60.2
	18.6502	57.3925	92.1715	86.8919	56.0187	86.3841	83.5398	91.8815
	61.7	56.7	22.8	11.5	36.6	49.2	34.4	30.7
	6	0.4	0.1	0	40.2	33.2	26.3	39.9
	19.6	45.9	58	79.7	47.6	81.2	82.5	89.2
	75	44	28.5	29.2	15.1	76.4	89.2	92.1
	21.8	90.5	96.3	97.5	46.3	2.5	0.1	0
Figure 1-figure supplement 1S
	Vehicle	10 ng/ml	100 ng/ml
BFU-E (Colonies/20000 cells):	4	3	5
	3	5	4
	2	2	2
Figure 1-figure supplement 1T
	Vehicle	10 ng/ml	100 ng/ml
CFU-G/M/GM (Colonies/20000 cells):	40	42	42
	36	45	43
	36	47	48
