# Supplementary material for: Clec11a/osteolectin is an osteogenic growth factor that promotes the maintenance of the adult skeleton
Source: eLife. 2016 Dec 13;5:e18782. doi: 10.7554/eLife.18782 (PMC5158134; doi:10.7554/eLife.18782)
Supplement: Figure 2—source data 1. — DOI: http://dx.doi.org/10.7554/eLife.18782.006 [file elife-18782-fig2-data1.xlsx]

## Sheet: Figure 2
Figure 2D
	Control				Clec11a KO
	2 m	10 m	16 m		2 m	10 m	16 m
BV/TV (%)	2.56	9.19	2.56		1.86	5.7	1.34
	5.81	6.57	3.33		5.68	4.18	1
	19.52	6.18	4.08		9.24	2.9	1.26
	5.29	3.32	2.68		4.14	0.33	0.87
	6.71	3.62			3.55	0.34
	5.99				4.09
	7.35				7.13
	8.2				7.59
	22.97				17.05
Figure 2E
	Control				Clec11a KO
	2 m	10 m	16 m		2 m	10 m	16 m
Tb. N. (1/mm)	1.2695	2.2619	0.6847		1.1644	1.6156	0.4486
	2.2155	2.0276	0.9851		2.3091	1.6535	0.4283
	5.251	1.8749	1.2857		3.716	1.0535	0.4926
	2.3426	1.259	0.8717		2.0852	0.2111	0.3605
	2.5882	1.3308			1.8298	0.2091
	2.3641				1.6998
	3.0714				3.0592
	3.2331				3.2949
	5.1285				5.0759
Figure 2F
	Control				Clec11a KO
	2 m	10 m	16 m		2 m	10 m	16 m
Tb. Th. (mm)	0.0201	0.0406	0.0374		0.016	0.0353	0.0299
	0.0262	0.0326	0.0338		0.0246	0.0253	0.0234
	0.0372	0.033	0.0318		0.0249	0.0275	0.0256
	0.0226	0.0264	0.0307		0.0199	0.0157	0.0241
	0.0259	0.0272			0.0194	0.0165
	0.0253				0.024
	0.0239				0.0233
	0.0254				0.023
	0.0448				0.0336
Figure 2G
	Control				Clec11a KO
	2 m	10 m	16 m		2 m	10 m	16 m
Tb. Sp. (mm)	0.7676	0.4015	1.423		0.8428	0.5837	2.1991
	0.4251	0.4631	0.9813		0.4085	0.5795	2.3112
	0.1533	0.5004	0.746		0.2442	0.9217	2.0044
	0.4043	0.7679	1.1164		0.4597	4.7205	2.7496
	0.3604	0.7242			0.5271	4.7669
	0.3977				0.5643
	0.3016				0.3036
	0.2839				0.2805
	0.1502				0.1634
Figure 2H
	Control				Clec11a KO
	2 m	10 m	16 m		2 m	10 m	16 m
Conn. D. (1/mm^3)	43.9564	54.8427	24.6951		41.3399	36.7204	2.2781
	112.992	75.835	30.912		137.836	62.3938	6.1493
	260.875	53.7243	25.7715		211.153	26.4364	3.3182
	121.35	87.7753	38.992		118.33	5.6027	3.8106
	177.07	71.8208			118.546	8.3895
	144.586				78.5319
	231.889				205.725
	191.923				226.987
	315.316				275.216
Figure 2I
	Control				Clec11a KO
	2 m	10 m	16 m		2 m	10 m	16 m
BMD (mg HA/ccm)	793.816	892.658	973.367		760.632	857.788	913.041
	800.946	824.02	948.7		819.159	812.029	938.283
	837.76	842.686	930.231		781.178	864.01	930.87
	837.371	901.73	909.398		768.28	869.522	924.608
	793.557	916.3			751.363	906.714
	823.76				805.418
	755.771				759.595
	787.076				761.085
	855.779				812.483
Figure 2M
	Control				Clec11a KO
	2 m	10 m	16 m		2 m	10 m	16 m
BV/TV (%)	15.24	13.52	12.35		11.23	11.29	5.77
	10.77	12.58	12.5		8.65	9.88	8.48
	13.1	15.8	14.19		9.55	11.28	10.09
	17.47				11.25
	10.58				10.14
Figure 2N
	Control				Clec11a KO
	2 m	10 m	16 m		2 m	10 m	16 m
Tb. N. (1/mm)	5.1454	4.2631	3.7538		4.0097	3.6085	2.0949
	4.1477	4.0528	3.8668		3.34	3.5761	2.6936
	4.9097	4.6368	4.0349		3.7131	3.6923	3.0035
	4.6347				3.5429
	3.6597				3.3832
Figure 2O
	Control				Clec11a KO
	2 m	10 m	16 m		2 m	10 m	16 m
Tb. Th. (mm)	0.0296	0.0317	0.0306		0.028	0.0316	0.0275
	0.026	0.0318	0.0323		0.0259	0.0268	0.0315
	0.0267	0.0341	0.0378		0.0257	0.0313	0.03
	0.0377				0.0318
	0.0289				0.03
Figure 2P
	Control				Clec11a KO
	2 m	10 m	16 m		2 m	10 m	16 m
Tb. Sp. (mm)	0.1647	0.2029	0.2678		0.2214	0.2481	0.4498
	0.2151	0.2112	0.2286		0.2735	0.2459	0.3398
	0.177	0.1816	0.2072		0.2436	0.2441	0.2996
	0.1781				0.2505
	0.2443				0.2656
Figure 2Q
	Control				Clec11a KO
	2 m	10 m	16 m		2 m	10 m	16 m
Conn. D. (1/mm^3)	263.458	150.567	100.317		203.883	117.549	68.0887
	204.112	121.73	101.431		169.57	144.195	84.3154
	234.549	153.899	138.667		163.568	119.302	107.518
	146.152				107.823
	159.07				190.494
Figure 2R
	Control				Clec11a KO
	2 m	10 m	16 m		2 m	10 m	16 m
BMD (mg HA/ccm)	819.417	847.028	912.721		806.649	881.639	875.592
	799.714	867.769	933.107		777.612	844.241	900.451
	802.566	874.121	926.588		770.677	856.426	913.935
	825.705				806.714
	804.51				790.51
Figure 2T
	Control			Clec11a KO
	2 m	10 m		2 m	10 m
Trabecular MAR	1.52717	1.42742		1.22675	0.904534
(um/day)	1.73962	1.26848		1.49378	1.18126
	2.0974	1.5245		1.51509	1.14189
	1.71158	1.49489		1.06459	1.03457
Figure 2U
	Control			Clec11a KO
	2 m	10 m		2 m	10 m
Trabecular BFR	0.720061	0.600418		0.675424	0.165826
(um^3/um^2/day)	1.04739	0.624676		0.726017	0.39874
	0.971027	0.491996		0.756891	0.407024
	0.915312	0.573669		0.535746	0.345381
Figure 2V
	Control			Clec11a KO
	2 m	10 m		2 m	10 m
DPD/Creatinine	25.9433	9.59855		25.7423	8.25075
(nmol/mmol)	20.2926	8.72186		19.4084	14.4249
	19.5136	13.4427		26.4612	6.90058
	29.5004	13.6179		16.4697	14.0419

## Sheet: Figure 2-figure supplement 1
Figure 2-figure supplement 1D
	Control				Clec11a KO
	2 m	10 m	16 m		2 m	10 m	16 m
Tt. Ar. (mm^2)	1.588	2.1554	2.3831		1.5766	2.2314	2.3414
	1.5954	2.1671	2.4423		1.6706	2.2394	2.4223
	2.0883	2.1731	2.3883		1.8171	2.0231	2.2077
	1.4034	1.9294	2.2791		1.5394	1.7829	2.2651
	1.568	2.0529			1.6471	1.8086
	1.5614				1.63
	1.3937				1.522
	1.4377				1.3991
	1.5814				1.6614
Figure 2-figure supplement 1E
	Control				Clec11a KO
	2 m	10 m	16 m		2 m	10 m	16 m
Ct. Ar. (mm^2)	0.6943	0.8934	1.0049		0.6949	0.9457	0.952
	0.6769	0.8789	1.0323		0.6931	0.8577	0.94
	0.9649	0.9437	0.9686		0.7629	0.8629	0.8697
	0.5711	0.8631	0.9323		0.6786	0.7249	0.914
	0.7777	0.8517			0.7737	0.8369
	0.804				0.7737
	0.6623				0.6963
	0.6634				0.6534
	0.7157				0.7266
Figure 2-figure supplement 1F
	Control				Clec11a KO
	2 m	10 m	16 m		2 m	10 m	16 m
Ct. Ar./Tt. Ar. (%)	0.4372	0.4145	0.4217		0.4407	0.4238	0.4066
	0.4242	0.4055	0.4227		0.4149	0.383	0.3939
	0.462	0.4343	0.4056		0.4198	0.4265	0.3881
	0.407	0.4474	0.4091		0.4408	0.4066	0.4035
	0.496	0.4149			0.4697	0.4627
	0.5149				0.4747
	0.4752				0.4575
	0.4614				0.467
	0.4526				0.4373
Figure 2-figure supplement 1G
	Control				Clec11a KO
	2 m	10 m	16 m		2 m	10 m	16 m
Ct. Th. (mm)	0.17	0.181	0.197		0.167	0.187	0.186
	0.163	0.177	0.197		0.158	0.168	0.176
	0.201	0.189	0.186		0.168	0.18	0.174
	0.147	0.188	0.185		0.165	0.165	0.18
	0.19	0.182			0.185	0.191
	0.202				0.186
	0.17				0.171
	0.171				0.17
	0.171				0.172
Figure 2-figure supplement 1H
	Control				Clec11a KO
	2 m	10 m	16 m		2 m	10 m	16 m
BMD (mg HA/ccm)	1139.21	1192.55	1216.02		1144.53	1182.25	1216.65
	1148.28	1118.79	1209.11		1090.92	1164.42	1201.44
	1085.54	1173.24	1206.3		1098.77	1171.94	1219.02
	1066.68	901.73	1208.73		1133.18	869.522	1224.58
	1158.72	916.3			1152.89	906.714
	1169.22				1155.82
	1052.75				1115.36
	1144.65				1104.47
	1110.11				1120.22
Figure 2-figure supplement 1I
	Control				Clec11a KO
	2 m	10 m	16 m		2 m	10 m	16 m
Femur length (mm)	15.4	16.59	16.3		14.04	16.17	15.9
	15.72	16.27	16.12		15.42	15.77	15.8
	15.42	16.42	16.02		14.76	15.95	15.29
	14.61	16.36	16.07		14.12	15.78	15.89
	14.56	16.46			14.3	15.93
	13.91	16.43			13.35	15.92
	15.05	16.24			14.79	16.05
		16.39				15.91
Figure 2-figure supplement 1J
	Control				Clec11a KO
	2 m	10 m	16 m		2 m	10 m	16 m
Peak load (N)	13.81	21.06	14.65		13.39	19.6	12.44
	14.46	22.79	14.19		11.61	15.58	12.65
	19.3	18.01	17.17		13.9	11.75	13.51
	12.74	18.72	16.03		14.57	15.73	11.69
	12.6				10.99
	12.65				13.02
	13.22				10.8
	17.28				14.72
	14.99				12.58
Figure 2-figure supplement 1K
	Control				Clec11a KO
	2 m	10 m	16 m		2 m	10 m	16 m
Fracture energy (mJ)	8.36	9.94	10.41		5.45	8.11	9.09
	7.6	11.44	7.63		7.83	6.27	5.96
	10.75	8.24	11.08		9.46	6.12	5.99
	4.18	9.41	11.78		3.49	6.01	6.88
	8.69				6.12
	4.21				3.26
Figure 2-figure supplement 1L
	Control				Clec11a KO
	2 m	10 m	16 m		2 m	10 m	16 m
Yield load (N)	9.9	16.39	12.49		9.66	11.19	11.62
	11.68	11.28	10.07		6.57	10.03	9.32
	16.91	10.09	10.33		11.02	9.65	10.3
	10.24	16.55	10.24		10.32	12.53	10.18
	12.6				10.99
	8.59				13.02
Figure 2-figure supplement 1M
	Control				Clec11a KO
	2 m	10 m	16 m		2 m	10 m	16 m
BV/TV (%)	21.04	19.57	20.33		22.37	20.23	18.84
	18.96	20.01	19.18		17.9	16.03	19.42
	19.74	22.1	18.82		17.27	19.18	17.99
	26.05				21.51
	21.35				23.98
Figure 2-figure supplement 1N
	Control				Clec11a KO
	2 m	10 m	16 m		2 m	10 m	16 m
Tb. N. (1/mm)	3.2871	3.2275	3.2061		3.0486	3.068	2.8308
	3.2502	2.9701	2.9778		3.1969	3.1883	2.9781
	3.4889	3.3025	2.9323		3.2074	3.0268	2.7562
	3.2855				2.913
	2.9463				2.9664
Figure 2-figure supplement 1O
	Control				Clec11a KO
	2 m	10 m	16 m		2 m	10 m	16 m
Tb. Th. (mm)	0.064	0.0607	0.0634		0.0734	0.0659	0.0633
	0.0583	0.0674	0.0644		0.056	0.0503	0.0686
	0.0566	0.0669	0.0642		0.0539	0.0634	0.0653
	0.0793				0.0738
	0.0725				0.0809
Figure 2-figure supplement 1P
	Control				Clec11a KO
	2 m	10 m	16 m		2 m	10 m	16 m
Tb. Sp. (mm)	0.2402	0.2492	0.2485		0.2547	0.26	0.2847
	0.2493	0.2693	0.2714		0.2568	0.2634	0.2725
	0.23	0.2359	0.2768		0.2579	0.267	0.2976
	0.2251				0.2695
	0.2669				0.2563
Figure 2-figure supplement 1Q
	Control				Clec11a KO
	2 m	10 m	16 m		2 m	10 m	16 m
Conn. D. (1/mm^3)	95.2071	79.4794	68.3435		83.5522	64.3602	104.202
	93.1548	58.3759	73.1729		87.7999	103.693	68.2213
	112.54	71.385	60.5895		63.9978	68.488	50.7583
	76.1328				92.8484
	73.9939				61.0496
Figure 2-figure supplement 1R
	Control				Clec11a KO
	2 m	10 m	16 m		2 m	10 m	16 m
BMD (mg HA/ccm)	885.334	906.722	964.101		891.815	925.324	941.223
	865.695	919.944	966.466		855.843	889.806	958.733
	861.093	923.768	965.89		838.019	911.454	954.515
	894.926				887.926
	879.436				899.404
Figure 2-figure supplement 1T
	Control			Control
	2 m	10 m		2 m	10 m
CFU-F/5X10^5 cells	16	75		6	41
	15	38		5	70
	9	40		8	32
	21	54		32	26
	24	60		30	37
	30	50		35	58
Figure 2-figure supplement 1U
	Control			Control
	2 m	10 m		2 m	10 m
Cells/colony	445	601		445	664
	483	527		472	432
	537	664		490	466
	491	398		456	494
	438	434		429	397
	466	485		517	417
