# Supplementary material for: Clec11a/osteolectin is an osteogenic growth factor that promotes the maintenance of the adult skeleton
Source: eLife. 2016 Dec 13;5:e18782. doi: 10.7554/eLife.18782 (PMC5158134; doi:10.7554/eLife.18782)
Supplement: Figure 3—source data 1. — DOI: http://dx.doi.org/10.7554/eLife.18782.009 [file elife-18782-fig3-data1.xlsx]

## Sheet: Figure 3
Figure 3B
	Control	Clec11a KO
OD405	2.5455	1.394
	2.4445	0.952333
	2.451	0.507667
Figure 3D
	Control	Clec11a KO
OD562	0.252	0.094
	0.248	0.095
	0.282	0.096
Figure 3F
	Control	Clec11a KO
OD500	0.0403333	0.0356667
	0.0403333	0.036
	0.0713333	0.063
Figure 3H
	Control	Clec11a KO
Pellets that contain chondrocytes (%)	80	90
	80	70
	100	90
Figure 3K
	Control	Clec11a KO
Adipocytes per mm^2	66.3689	66.3689
	85.581	77.7215
	76.4116	79.9047
Figure 3N
	Control	Clec11a KO
Chondrocytes per mm^2	427.905	516.979
	489.034	429.652
	482.048	431.398

## Sheet: Figure 3-figure supplement 1
Figure 3-figure supplement 1B
	Control	Clec11a KO
CD45-Ter119-Tie2-LepR+	0.387838	0.584326
Frequency (%)	0.374619	0.307242
	0.314751	0.276209
	0.2476	0.1944
	0.294	0.2016
Figure 3-figure supplement 1C
	Control	Clec11a KO
CD45-Ter119-Tie2-CD51+6C3-CD105-CD200+	0.0196019	0.0248054
Frequency (%)	0.0250013	0.0164023
	0.0143886	0.0110004
	0.0218	0.0198
	0.0222	0.0274
Figure 3-figure supplement 1D
	Control	Clec11a KO
CD45-Ter119-Tie2-CD51+6C3-CD105-CD200-	0.0418041	0.0398086
Frequency (%)	0.0262014	0.0316044
	0.0419668	0.0294009
	0.0246	0.0196
	0.0304	0.0294
Figure 3-figure supplement 1E
	Control	Clec11a KO
CD45-Ter119-Tie2-CD51+6C3-CD105+	0.00560055	0.00800173
Frequency (%)	0.00320017	0.00400055
	0.00339732	0.00340011
	0.0066	0.0044
	0.0062	0.0062
Figure 3-figure supplement 1F
	Control	Clec11a KO
CD45-Ter119-Tie2-CD51+6C3+CD105-	0.275627	0.288462
Frequency (%)	0.275414	0.21743
	0.209435	0.197006
	0.1326	0.121
	0.1774	0.1016
Figure 3-figure supplement 1G
	Control	Clec11a KO
CD45-Ter119-Tie2-CD51+6C3+CD105+	0.00520051	0.0108824
Frequency (%)	0.00360019	0.00300041
	0.00279779	0.00360012
	0.0128	0.002
	0.005	0.001
Figure 3-figure supplement 1H
	Control	Clec11a KO
CD45-Ter119-Tie2-LepR+	6.1	17.8
Frequency (%)	9.7	11.9
	33.8	12.9
	12.5	15
	7.5	13.5
Figure 3-figure supplement 1I
	Control	Clec11a KO
CD45-Ter119-Tie2-CD51+6C3-CD105-CD200+	0.6	1.1
Frequency (%)	5	10.1
	10.7	0.6
	5	4.6
	3.6	6.3
Figure 3-figure supplement 1J
	Control	Clec11a KO
CD45-Ter119-Tie2-CD51+6C3-CD105-CD200-	12.3	22.3
Frequency (%)	4.4	21.4
	29.5	6.4
	15	16.3
	11.7	12.6
Figure 3-figure supplement 1K
	Control	Clec11a KO
CD45-Ter119-Tie2-CD51+6C3-CD105+	12.7	27.8
Frequency (%)	4.6	24
	28	20.7
	25	14.5
	30	10
Figure 3-figure supplement 1L
	Control	Clec11a KO
CD45-Ter119-Tie2-CD51+6C3+CD105-	3.2	5.1
Frequency (%)	2.3	6.3
	16.5	1
	5.4	12.6
	3.1	8.7
Figure 3-figure supplement 1M
	Control	Clec11a KO
CD45-Ter119-Tie2-CD51+6C3+CD105+	27.3	6.5
Frequency (%)	29.4	24.6
	25	9.1
	13.7	25
	16.5	20
Figure 3-figure supplement 1N
	Osx		Runx2		Col1a1		Ibsp		Dmp1
	Control	Clec11a KO	Control	Clec11a KO	Control	Clec11a KO	Control	Clec11a KO	Control	Clec11a KO
Relative mRNA level	1	0.277392	1	0.486328	1	0.205898	1	0.633644	1	0.441351
	1	0.726986	1	1	1	0.76313	1	0.473876	1	0.399149
	1	1.51055	1	2.69447	1	1.27176	1	0.420063	1	0.436786
Figure 3-figure supplement 1P
	Control	Clec11a KO
Bone area ratio (%)	11.3361	1.97035
	4.58232	1.59011
	7.07615	2.05383
Figure 3-figure supplement 1P
	Control	Clec11a KO
Adipocytes/ mm^2	44.4444	68.254
	55.5556	38.0952
	79.3651	50.7936

## Sheet: Figure 3-figure supplement 2
Figure 3-figure supplement 2C
	Control	Clec11a KO
Aipocyte number per mm^2	101.3	398.214
	87.3276	426.159
	85.581	406.946
	75.1017	211.333
	38.4241	282.941
Figure 3-figure supplement 2F
	Control	Clec11a KO
Chondrocyte number per mm^2	356	369
	387	392
	370	408
	365	377
	396	365
