# Supplementary material for: Clec11a/osteolectin is an osteogenic growth factor that promotes the maintenance of the adult skeleton
Source: eLife. 2016 Dec 13;5:e18782. doi: 10.7554/eLife.18782 (PMC5158134; doi:10.7554/eLife.18782)
Supplement: Figure 4—source data 1. — DOI: http://dx.doi.org/10.7554/eLife.18782.013 [file elife-18782-fig4-data1.xlsx]

## Sheet: Figure 4
Figure 4E
	Control	Clec11a KO
BV/TV (%)	0.1353	0.1059
	0.1303	0.0805
	0.1279	0.0807
Figure 4F
	Control	Clec11a KO
Tb. N. (1/mm)	6.6791	5.6642
	6.8851	4.7338
	6.2715	4.7137
Figure 4G
	Control	Clec11a KO
Tb. Th. (mm)	0.0203	0.0187
	0.0189	0.017
	0.0204	0.0171
Figure 4H
	Control	Clec11a KO
Conn. D. (1/mm^3)	838.556	735.01
	1002.75	511.088
	1026.45	623.884
Figure 4I
	Control	Clec11a KO
Tb. Sp. (mm)	0.1295	0.1579
	0.1263	0.1942
	0.1391	0.195
Figure 4J
	Control	Clec11a KO
BMD (mg HA/ccm)	697.891	686.419
	684.604	687.651
	688.623	664.771
Figure 4K
	Control	Clec11a KO
Callus volume (mm^3)	24.1552	27.8713
	20.2419	33.5631
	18.2858	34.286
Figure 4L
	Control	Clec11a KO
Callus diameter (mm)	4.34	5.14
	3.82	4.5
	4.21	4.86
Figure 4M
	Control	Clec11a KO
pMOI (mm^4)	1.92241	2.63985
	1.17872	4.10285
	2.39741	3.61123
