# Supplementary material for: Clec11a/osteolectin is an osteogenic growth factor that promotes the maintenance of the adult skeleton
Source: eLife. 2016 Dec 13;5:e18782. doi: 10.7554/eLife.18782 (PMC5158134; doi:10.7554/eLife.18782)
Supplement: Figure 5—source data 1. — DOI: http://dx.doi.org/10.7554/eLife.18782.015 [file elife-18782-fig5-data1.xlsx]

## Sheet: Figure 5
Figure 5B
	Control	rClec11a
Alizarin red	0.124	0.2995
OD562	0.14425	0.276
	0.15225	0.2705
Figure 5D
	Vehicle	12.5 ug/kg	25 ug/kg	50 ug/kg
BV/TV (%)	0.0592	0.0751	0.0676	0.0868
	0.0683	0.076	0.0641	0.0823
	0.0563	0.0676	0.0811	0.0901
	0.0672	0.0923	0.0792	0.1
	0.0593	0.0632	0.0762	0.0782
	0.0545	0.0634	0.0974	0.1016
Figure 5E
	Vehicle	12.5 ug/kg	25 ug/kg	50 ug/kg
Tb. N. (1/mm)	2.9292	3.5161	3.4464	4.0873
	3.3097	3.7339	2.9998	3.7912
	2.8404	3.386	4.0361	4.3327
	3.2752	4.1734	3.5546	4.1403
	3.0346	3.2291	3.3444	3.7632
	2.6555	3.0222	4.5379	4.4803
Figure 5F
	Vehicle	12.5 ug/kg	25 ug/kg	50 ug/kg
Tb. Th. (mm)	0.0202	0.0214	0.0196	0.0212
	0.0206	0.0204	0.0214	0.0217
	0.0198	0.02	0.0201	0.0208
	0.0205	0.0221	0.0223	0.0242
	0.0195	0.0196	0.0228	0.0208
	0.0205	0.021	0.0215	0.0227
Figure 5G
	Vehicle	12.5 ug/kg	25 ug/kg	50 ug/kg
Tb. Sp. (mm)	0.3212	0.263	0.2705	0.2234
	0.2815	0.2475	0.312	0.2421
	0.3323	0.2754	0.2277	0.21
	0.2848	0.2175	0.259	0.2174
	0.31	0.2901	0.2762	0.245
	0.3561	0.3099	0.1989	0.2005
Figure 5H
	Vehicle	12.5 ug/kg	25 ug/kg	50 ug/kg
MS/BS (%)	25.3881	34.6882	33.4472	33.8455
	27.3994	36.2322	38.9712	45.5034
	24.8995	29.6611	41.523	41.3223
Figure 5I
	Vehicle	12.5 ug/kg	25 ug/kg	50 ug/kg
BFR	0.282352	0.481652	0.666803	0.746841
um^3/um^2/day	0.434856	0.44714	0.701651	0.839383
	0.363978	0.337815	0.807254	0.772481
Figure 5J
	Vehicle	12.5 ug/kg	25 ug/kg	50 ug/kg
DPD/Creatinine	20.3233	21.8112	25.8801	19.8849
nmol/mmol	31.5327	37.9861	34.0658	29.7295
	29.5004	29.0807	32.0222	22.3901
	26.4613	29.3208	37.6139	36.8415
Figure 5L
	Control+Vehicle	Clec11a KO+Vehicle	Clec11a KO+rClec11a
BV/TV (%)	3.42	2.13	2.22
	2.58	0.66	3.21
	3.88	0.24	4.22
	4.32	0.56	3.51
	5.31
	3.96
Figure 5M
	Control+Vehicle	Clec11a KO+Vehicle	Clec11a KO+rClec11a
Tb. N. (1/mm)	1.2451	0.9018	1.0543
	0.9974	0.442	1.3002
	1.3041	0.1296	1.4649
	1.5826	0.2122	1.4269
	1.9798
	1.5312
Figure 5N
	Control+Vehicle	Clec11a KO+Vehicle	Clec11a KO+rClec11a
Tb. Th. (mm)	0.0275	0.0236	0.021
	0.0259	0.0148	0.0247
	0.0298	0.0181	0.0288
	0.0273	0.0266	0.0246
	0.0268
	0.0259
Figure 5O
	Control+Vehicle	Clec11a KO+Vehicle	Clec11a KO+rClec11a
Tb. Sp. (mm)	0.7756	1.0852	0.9274
	0.9768	2.2478	0.7444
	0.7371	7.7003	0.6539
	0.6046	4.6852	0.6762
	0.4783
	0.6272
Figure 5P
	Control+Vehicle	Clec11a KO+Vehicle	Clec11a KO+rClec11a
Conn. D. (1/mm^3)	42.3688	29.6629	41.3139
	19.0283	9.6114	47.8682
	51.1095	0	41.2634
	37.1572	8.2336	43.9917
	74.8789
	70.9285
Figure 5Q
	Control+Vehicle	Clec11a KO+Vehicle	Clec11a KO+rClec11a
BMD (mg HA/ccm)	884.923	885.562	877.062
	874.826	837.825	895.339
	937.836	895.211	898.151
	891.952	920.965	895.467
	886.201

## Sheet: Figure 5-figure supplement 1
	Figure 5-figure supplement 1A
		Vehicle	rClec11a
	% Sorted cells formed colonies	5	4.6
		4.6	4.4
		7.4	6.4
		6.4	7.8
		6.8	7.4
	Figure 5-figure supplement 1B
		Vehicle	rClec11a
	Total cells/colony	450	475
		532	518
		498	483
		520	533
		433	440
	Figure 5-figure supplement 1C
		Vehicle	rClec11a
	Colonies that contain ALP+ osteoblasts (%)	90	87
		75	94
		80	76
		78	73
		85	80
	Figure 5-figure supplement 1D
		Vehicle	rClec11a
	ALP+ osteoblasts/colony	273	388
		320	430
		230	390
		205	375
		285	338
	Figure 5-figure supplement 1E
		Vehicle	rClec11a
	EdU+ALP+ osteoblasts (%)	25	15
		33	19
		19	30
		14	22
		10	20
	Figure 5-figure supplement 1F
		Vehicle	rClec11a
	Caspase-3/7+ ALP+ osteoblasts (%)	0.5	0.3
		0.8	0.9
		1	1.2
		0.4	1
		0.7	0.5
	Figure 5-figure supplement 1G
		Osx		Runx2		Col1a1		Ibsp		Dmp1
		Vehicle	rClec11a	Vehicle	rClec11a	Vehicle	rClec11a	Vehicle	rClec11a	Vehicle	rClec11a
	Relative mRNA level	1	1.11729	1	1.23971	1	2.14355	1	2.28153	1	1.38511
		1	0.63728	1	0.790041	1	0.952638	1	4.22807	1	1.47427
		1	1.34723	1	1.59107	1	1.18921	1	2.49666	1	2.23457
		1	0.846745	1	1.07923	1	0.972655	1	4.43828	1	1.94531
	Figure 5-figure supplement 1I
		Control	Clec11a-OE
	Alizarin Red (OD562)	0.103	0.152
		0.105	0.154
		0.104	0.155
	Figure 5-figure supplement 1K
		PBS		rClec11a
		Control	Clec11a KO	Control	Clec11a KO
	ALP (OD405)	1.42	0.732	2.761	1.622
		1.559	0.684	2.522	1.925
		2.017	0.77	2.515	1.87
	Figure 5-figure supplement 1M
		PBS		rClec11a
		Control	Clec11a KO	Control	Clec11a KO
	Alizarin red (OD562)	1.0505	0.1945	1.752	1.044
		0.998	0.158	1.5115	1.054
		1.1575	0.133	1.712	1.4605
	Figure 5-figure supplement 1O
		Vehicle	12.5 ug/kg	25 ug/kg	50 ug/kg
	Tt. Ar. (mm^2)	1.45371	1.37457	1.374	1.42
		1.45143	1.46	1.50429	1.53229
		1.41886	1.48314	1.38371	1.36457
		1.51114	1.37971	1.41086	1.43457
		1.48914	1.49629	1.49171	1.574
		1.39771	1.44686	1.438	1.37914
	Figure 5-figure supplement 1P
		Vehicle	12.5 ug/kg	25 ug/kg	50 ug/kg
	Ct. Ar. (mm^2)	0.586	0.530286	0.526286	0.531143
		0.541714	0.555143	0.580857	0.559143
		0.583143	0.598	0.507429	0.554571
		0.604571	0.558	0.542571	0.565429
		0.553714	0.535429	0.568857	0.589143
		0.562857	0.573143	0.528857	0.558571
	Figure 5-figure supplement 1Q
		Vehicle	12.5 ug/kg	25 ug/kg	50 ug/kg
	Ct. Ar./Tt. Ar. (%)	40.3105	38.5783	38.3032	37.4044
		37.3228	38.0235	38.6135	36.4908
		41.0995	40.3198	36.6715	40.6407
		40.0076	40.4432	38.4569	39.4145
		37.1834	35.7838	38.1345	37.4297
		40.2698	39.613	36.7773	40.5013
	Figure 5-figure supplement 1R
		Vehicle	12.5 ug/kg	25 ug/kg	50 ug/kg
	Ct. Th. (mm)	0.142	0.131	0.128	0.13
		0.128	0.132	0.135	0.126
		0.135	0.137	0.122	0.137
		0.141	0.14	0.132	0.138
		0.128	0.125	0.136	0.131
		0.129	0.129	0.124	0.138
	Figure 5-figure supplement 1S
		Vehicle	12.5 ug/kg	25 ug/kg	50 ug/kg
	BMD (mg HA/ccm)	1161.47	1118.95	1150.16	1157.5
		1139.78	1129.13	1156.64	1146.39
		1134.75	1121.26	1144.54	1153.93
		1152.61	1175.89	1155.52	1148.38
		1135.81	1110.02	1107.57	1134.55
		1152.87	1147.78	1138.26	1146.86
