# Supplementary material for: Clec11a/osteolectin is an osteogenic growth factor that promotes the maintenance of the adult skeleton
Source: eLife. 2016 Dec 13;5:e18782. doi: 10.7554/eLife.18782 (PMC5158134; doi:10.7554/eLife.18782)
Supplement: Figure 6—source data 1. — DOI: http://dx.doi.org/10.7554/eLife.18782.018 [file elife-18782-fig6-data1.xlsx]

## Sheet: Figure 6
Figure 6B
	Mock+Vehicle	OVX+Vehicle	OVX+PTH (1-34)	OVX+rClec11a
BV/TV (%)	5.58	3.19	5.59	5.54
	4.5	3.3	4.82	5.9
	5.11	3.22	5.29	5.6
	6.04	3.38	4.88	3.94
	6.88	1.5	7.72	5.28
	6.98	4.03	8.21	6.53
				6.51
				5.55
Figure 6C
	Mock+Vehicle	OVX+Vehicle	OVX+PTH (1-34)	OVX+rClec11a
Tb. N. (1/mm)	2.1996	1.3899	2.3355	2.1734
	2.2085	1.5781	2.2237	2.2215
	2.3236	1.4799	2.2231	2.3887
	2.3461	1.5169	2.1346	1.6945
	3.0728	0.9181	3.4108	2.3694
	3.3269	1.598	3.6307	2.7782
				3.3331
				2.822
Figure 6D
	Mock+Vehicle	OVX+Vehicle	OVX+PTH (1-34)	OVX+rClec11a
Tb. Th. (mm)	0.0254	0.023	0.0239	0.0255
	0.0204	0.0209	0.0217	0.0266
	0.022	0.0218	0.0238	0.0234
	0.0257	0.0223	0.0229	0.0233
	0.0224	0.0163	0.0226	0.0223
	0.021	0.0252	0.0226	0.0235
				0.0195
				0.0197
Figure 6E
	Mock+Vehicle	OVX+Vehicle	OVX+PTH (1-34)	OVX+rClec11a
Tb. Sp. (mm)	0.4293	0.6965	0.4042	0.4346
	0.4324	0.6128	0.428	0.4236
	0.4084	0.6539	0.426	0.3952
	0.4005	0.637	0.4456	0.5669
	0.303	1.0729	0.2706	0.3998
	0.2796	0.6006	0.2528	0.3364
				0.2805
				0.3347
Figure 6F
	Mock+Vehicle	OVX+Vehicle	OVX+PTH (1-34)	OVX+rClec11a
DPD/Creatinine	24.051	49.3486	45.6255	37.3835
(nmol/mmol)	31.767	35.7108	65.1633	47.8199
	20.0979	34.0386	41.5952	37.243
	20.715	51.0207	41.4469	42.8608
Figure 6G
	Mock+Vehicle	OVX+Vehicle	OVX+PTH (1-34)	OVX+rClec11a
BFR (um^3/um^2/day)	0.504483	0.631723	0.855071	0.893116
	0.529267	0.414558	0.825801	0.727946
	0.580911	0.471606	0.837239	0.758682
		0.61783	0.702492
Figure 6I
	Mock+Vehicle	DEX+Vehicle	DEX+PTH (1-34)	DEX+rClec11a
BV/TV (%)	7.55	6.74	9.24	9.74
	8.24	5.76	10.31	8.74
	9.16	5.79	10.64	9.51
	8.06	5.08	10.7	8.5
Figure 6J
	Mock+Vehicle	DEX+Vehicle	DEX+PTH (1-34)	DEX+rClec11a
Tb. N. (1/mm)	3.0287	3.1163	3.5959	4.1291
	2.8622	2.4924	3.6795	3.4483
	3.7536	2.6201	3.8574	3.995
	2.983	2.4484	4.1881	3.2542
Figure 6K
	Mock+Vehicle	DEX+Vehicle	DEX+PTH (1-34)	DEX+rClec11a
Tb. Th. (mm)	0.0249	0.0216	0.0257	0.0236
	0.0288	0.0231	0.028	0.0253
	0.0244	0.0221	0.0276	0.0238
	0.027	0.0208	0.0255	0.0261
Figure 6L
	Mock+Vehicle	DEX+Vehicle	DEX+PTH (1-34)	DEX+rClec11a
Tb. Sp. (mm)	0.3052	0.2993	0.2524	0.2186
	0.3206	0.3781	0.2438	0.2647
	0.242	0.3596	0.2317	0.2265
	0.3082	0.3877	0.2132	0.2812
Figure 6M
	Mock+Vehicle	DEX+Vehicle	DEX+PTH (1-34)	DEX+rClec11a
BFR (um^3/um^2/day)	0.407626	0.127644	0.265606	0.452435
	0.4517	0.128074	0.387144	0.427756
	0.560165	0.130196	0.335037	0.29148
	0.554626		0.494792	0.374372
Figure 6N
	Mock+Vehicle	DEX+Vehicle	DEX+PTH (1-34)	DEX+rClec11a
DPD/Creatinine	26.7723	21.1699	18.9012	22.031
(nmol/mmol)	20.4897	26.2525	22.2809	22.7831
	17.6371	27.0534	31.5025	23.2172
	25.5732	35.0028	28.5959	41.2358

## Sheet: Figure 6-figure supplement 1
Fig 6-figure supplement 1B
	Mock+Vehicle	OVX+Vehicle	OVX+PTH (1-34)	OVX+rClec11a
Tt. Ar. (mm^2)	1.60514	1.582	1.68714	1.61114
	1.69657	1.58686	1.67486	1.72086
	1.53971	1.52771	1.56771	1.522
	1.59457	1.48571	1.56943	1.50086
	1.53429	1.404	1.57371	1.44371
	1.34543	1.47143	1.43886	1.38114
				1.36286
				1.48486
Fig 6-figure supplement 1C
	Mock+Vehicle	OVX+Vehicle	OVX+PTH (1-34)	OVX+rClec11a
Ct. Ar. (mm^2)	0.713143	0.651714	0.765714	0.671143
	0.742286	0.646857	0.766	0.722286
	0.704571	0.642	0.700286	0.659714
	0.711429	0.640286	0.706	0.666857
	0.694857	0.610857	0.72	0.662
	0.544	0.597714	0.589714	0.630286
				0.566571
				0.596286
Fig 6-figure supplement 1D
	Mock+Vehicle	OVX+Vehicle	OVX+PTH (1-34)	OVX+rClec11a
Ct. Ar./Tt. Ar. (%)	44.42	41.2	45.39	41.66
	43.76	40.76	45.74	41.97
	45.76	42.02	44.67	43.34
	44.62	43.09	44.98	44.44
	45.28	43.51	45.76	45.84
	40.44	40.63	41	45.63
				41.57
				40.15
Fig 6-figure supplement 1E
	Mock+Vehicle	OVX+Vehicle	OVX+PTH (1-34)	OVX+rClec11a
Ct. Th. (mm)	0.17	0.158	0.18	0.162
	0.171	0.155	0.182	0.165
	0.176	0.157	0.172	0.164
	0.17	0.161	0.172	0.165
	0.165	0.151	0.16	0.16
	0.135	0.14	0.136	0.16
				0.138
				0.141
Fig 6-figure supplement 1F
	Mock+Vehicle	OVX+Vehicle	OVX+PTH (1-34)	OVX+rClec11a
BMD (mg HA/ccm)	1112.9	1081.27	1102.85	1097.02
	1110.17	1070.57	1104.79	1099.87
	1035.9	1105.83	1116.01	1100.19
	1112.9	1090.79	1107.45	1117.95
	1174.5	1198.11	1220.73	1212.13
	1160.35	1150.23	1174.96	1218.09
				1196.46
				1185.88
Fig 6-figure supplement 1G
	Mock+Vehicle	OVX+Vehicle	OVX+PTH (1-34)	OVX+rClec11a
Osteoclast number (per mm)	8.37371	13.521	9.65204	12.3154
	8.30461	12.8569	12.0403	12.506
	7.30975	10.5815	10.8592	12.0808
	5.77006	10.4046	12.9077	11.3253
Fig 6-figure supplement 1H
	Mock+Vehicle	OVX+Vehicle	OVX+PTH (1-34)	OVX+rClec11a
Osteoblast number (per mm)	14.2522	10.3192	20.8545	16.9347
	13.0333	11.8466	17.1132	18.9819
	13.1621	12.0462	15.7072	18.3792
	14.8993	10.853	18.4559	18.2734

## Sheet: Figure 6-figure supplement 2
Fig 6-figure supplement 2A
	Mock+Vehicle	DEX+Vehicle	DEX+PTH (1-34)	DEX+rClec11a
WBC (10^3/ul)	4.32	2.82	2.62	5.2
	2.58	1.48	1.46	2.42
	3.86	2.26	1.34	2.2
	1.7	1.44	1.7	1.32
Fig 6-figure supplement 2B
	Mock+Vehicle	DEX+Vehicle	DEX+PTH (1-34)	DEX+rClec11a
Neutrophil (10^3/ul)	1.05	1.54	1.27	2.94
	0.47	0.43	0.56	1.44
	0.8	0.92	0.68	0.86
	0.34	0.56	0.58	0.47
Fig 6-figure supplement 2C
	Mock+Vehicle	DEX+Vehicle	DEX+PTH (1-34)	DEX+rClec11a
Lymphocyte (10^3/ul)	3.01	1.14	1.15	1.92
	2.06	0.97	0.82	0.77
	2.92	1.18	0.59	1.17
	2.39	1.43	0.82	1.33
Fig 6-figure supplement 2D
	Mock+Vehicle	DEX+Vehicle	DEX+PTH (1-34)	DEX+rClec11a
Monocyte (10^3/ul)	0.25	0.1	0.18	0.25
	0.05	0.06	0.08	0.18
	0.14	0.14	0.07	0.14
	0.13	0.1	0.12	0.07
Fig 6-figure supplement 2F
	Mock+Vehicle	DEX+Vehicle	DEX+PTH (1-34)	DEX+rClec11a
Tt. Ar. (mm^2)	1.31914	1.60886	1.462	1.51057
	1.41114	1.47886	1.45714	1.54
	1.45714	1.392	1.51229	1.47371
	1.47914	1.47829	1.48743	1.52143
Fig 6-figure supplement 2G
	Mock+Vehicle	DEX+Vehicle	DEX+PTH (1-34)	DEX+rClec11a
Ct. Ar. (mm^2)	0.562571	0.58	0.510571	0.550571
	0.627143	0.584571	0.530286	0.555143
	0.65	0.539714	0.599143	0.573429
	0.618286	0.502571	0.578571	0.529714
Fig 6-figure supplement 2H
	Mock+Vehicle	DEX+Vehicle	DEX+PTH (1-34)	DEX+rClec11a
Ct. Ar./Tt. Ar. (%)	42.64	36.05	34.92	36.45
	44.43	39.52	36.39	36.06
	44.6	38.78	39.61	38.9
	41.8	33.99	38.9	34.81
Fig 6-figure supplement 2I
	Mock+Vehicle	DEX+Vehicle	DEX+PTH (1-34)	DEX+rClec11a
Ct. Th. (mm)	0.151	0.132	0.125	0.135
	0.162	0.142	0.131	0.131
	0.162	0.137	0.142	0.14
	0.153	0.122	0.138	0.128
Fig 6-figure supplement 2J
	Mock+Vehicle	DEX+Vehicle	DEX+PTH (1-34)	DEX+rClec11a
BMD (mg HA/ccm)	1088.4	1069.02	994.869	1062.66
	1098.44	1099.03	1046.46	1092.41
	1085.48	1097.4	1098.83	1090.73
	1069.6	1046.33	1070.9	1056.05
Fig 6-figure supplement 2K
	Mock+Vehicle	DEX+Vehicle	DEX+PTH (1-34)	DEX+rClec11a
Plasma Clec11a (ng/ml)	2.99539	3.65971	3.83983	4.27467
	3.60704	2.84949	2.69784	4.03866
	4.08185	4.14887	3.51224	4.10188
	4.03204	3.18851	3.09801	3.54875
Fig 6-figure supplement 2L
	Mock+Vehicle	DEX+Vehicle	DEX+PTH (1-34)	DEX+rClec11a
Osteoblast number (per mm)	13.6548	7.79754	14.2023	19.7617
	16.366	7.58229	16.8669	19.1899
	16.7597	7.81328	14.8904	15.686
	16.9183	8.37328	14.1389	15.06
Fig 6-figure supplement 2M
	Mock+Vehicle	DEX+Vehicle	DEX+PTH (1-34)	DEX+rClec11a
Osteoclast number (per mm)	8.42525	8.33146	9.87622	8.49569
	8.89962	10.2454	10.3407	9.51123
	10.2848	9.19837	9.2881	9.85669
