# Supplementary material for: Clec11a/osteolectin is an osteogenic growth factor that promotes the maintenance of the adult skeleton
Source: eLife. 2016 Dec 13;5:e18782. doi: 10.7554/eLife.18782 (PMC5158134; doi:10.7554/eLife.18782)
Supplement: Figure 7—source data 1. — DOI: http://dx.doi.org/10.7554/eLife.18782.022 [file elife-18782-fig7-data1.xlsx]

## Sheet: Figure 7
Figure 7B
	Mock+Vehicle	OVX+Vehicle	OVX+PTH (1-34)	OVX+rClec11a
BV/TV (%)	6.03	3.15	5.26	5.8
	5.43	3.12	5.06	7.27
	5.16	3.13	4.37	4.52
	6.7	3.25	6.78	6.74
Figure 7C
	Mock+Vehicle	OVX+Vehicle	OVX+PTH (1-34)	OVX+rClec11a
Tb. N. (1/mm)	2.5462	1.1878	1.7303	2.1288
	1.9924	1.4349	1.7897	2.1508
	1.7162	1.3401	1.6095	1.6893
	2.2493	1.2123	2.2244	2.3374
Figure 7D
	Mock+Vehicle	OVX+Vehicle	OVX+PTH (1-34)	OVX+rClec11a
Tb. Th. (mm)	0.0237	0.0265	0.0304	0.0273
	0.0273	0.0218	0.0283	0.0338
	0.0301	0.0233	0.0271	0.0268
	0.0298	0.0268	0.0305	0.0288
Figure 7E
	Mock+Vehicle	OVX+Vehicle	OVX+PTH (1-34)	OVX+rClec11a
Tb. Sp. (mm)	0.3691	0.8153	0.5475	0.4425
	0.4746	0.6752	0.5305	0.4311
	0.5526	0.7229	0.5942	0.5652
	0.4148	0.7981	0.4191	0.399
Figure 7F
	Mock+Vehicle	OVX+Vehicle	OVX+PTH (1-34)	OVX+rClec11a
Conn. D. (1/mm^3)	136.245	85.6031	132.946	89.6149
	175.195	72.5489	83.6673	206.064
	120.825	59.9151	63.2298	169.363
	172.506	68.9608	295.139	333.591
Figure 7G
	Mock+Vehicle	OVX+Vehicle	OVX+PTH (1-34)	OVX+rClec11a
BMD (mg HA/ccm)	880.385	898.534	867.093	871.375
	881.024	830.476	877.318	895.659
	905.692	846.516	850.095	868.371
	874.57	860.639	827.983	832.521
Figure 7I
	Vehicle	rhClec11a
ALP (OD405)	0.718	1.578
	0.708	1.5955
	0.71	0.804
	0.692	0.808
	0.988	1.338
	0.982	1.299
Figure 7K
	Vehicle	rhClec11a
Alizarin red (OD562)	0.695	0.844
	0.681	0.834
	0.693	0.837
	0.7992	0.924
	0.7928	0.9248
	0.8256	0.9392
Figure 7M
	Vehicle	rhClec11a
Bone area ratio (%)	0	5.42617
	0	0.950066
	0	2.52212
	0	3.98653
	0	12.8531
	0	2.82543
	0	13.0641
Figure 7O
	Vehicle	rhClec11a
Bone area ratio (%)	0.340289	9.06365
	0.302088	6.97725
	0.254481	9.90479
	0.642664	2.49871
	0.506592	2.42949
		1.51992
		2.59629
		1.96246
		1.86236

## Sheet: Figure 7-figure supplement 1
Figure 7-figure supplement 1B
	Mock+Vehicle	OVX+Vehicle	OVX+PTH (1-34)	OVX+rClec11a
Tt. Ar. (mm^2)	1.572	1.4274	1.4629	1.4731
	1.4726	1.2934	1.5437	1.4511
	1.5449	1.4737	1.5417	1.5857
	1.6051	1.4803	1.6091	1.5134
Figure 7-figure supplement 1C
	Mock+Vehicle	OVX+Vehicle	OVX+PTH (1-34)	OVX+rClec11a
Ct. Ar. (mm^2)	0.7177	0.676	0.7246	0.6934
	0.7194	0.6151	0.7411	0.678
	0.732	0.6714	0.7226	0.6917
	0.7623	0.6474	0.7606	0.708
Figure 7-figure supplement 1D
	Mock+Vehicle	OVX+Vehicle	OVX+PTH (1-34)	OVX+rClec11a
Ct. Ar./Tt. Ar. (%)	45.66	47.35	49.54	47.07
	48.85	47.56	48.02	46.73
	47.38	45.56	46.86	43.61
	47.5	43.73	47.28	46.78
Figure 7-figure supplement 1E
	Mock+Vehicle	OVX+Vehicle	OVX+PTH (1-34)	OVX+rClec11a
Ct. Th. (mm)	0.178	0.177	0.188	0.18
	0.185	0.17	0.186	0.176
	0.185	0.172	0.182	0.168
	0.189	0.166	0.189	0.18
Figure 7-figure supplement 1F
	Mock+Vehicle	OVX+Vehicle	OVX+PTH (1-34)	OVX+rClec11a
BMD (mg HA/ccm)	1171.54	1169.62	1106.61	1118.62
	1172.82	1094.15	1154.28	1138.18
	1096.9	1127.57	1129.87	1126.48
	1093.06	1068.46	1087.18	1102.01
